# Supplementary material for: Genetic Affinities between Trans-Oceanic Populations of Non-Buoyant Macroalgae in the High Latitudes of the Southern Hemisphere
Source: PLoS One. 2013 Jul 22;8(7):e69138. doi: 10.1371/journal.pone.0069138 (PMC3718832; doi:10.1371/journal.pone.0069138)
Supplement: Table S6 — Cells marked with an asterisk were non-significant (P > 0.05). (XLS) [file pone.0069138.s010.xls]

## Sheet: Adenocystis COI
		New Zealand						Chatham Is	New Zealand sub-Antarctic			Macquarie Is	Falkland Is		Chile				South Georgia
		NZ.1&2 Stewart Is	NZ.3 Waipapa Pt	NZ.4 Curio Bay	NZ.5 Akatore	NZ.6 Brighton	NZ.9 Kaikoura	Chatham Is	Antipodes Is	Campbell Is	Auckland Is	Macquarie Is	Falkland_ Pembroke	Falkland_Sea Lion	Ch.1 Cocholgue	Ch.4 Cruise site 7	Ch.6 Cruise site 2	Ch.8 Punta Arenas	SG_Grytviken	SG_Cobblers Cove
New Zealand	NZ.1&2 Stewart Is	0
	NZ.3 Waipapa Pt	0.84426	0
	NZ.4 Curio Bay	0.94396	0.71869	0
	NZ.5 Akatore	0.93219	0.70793	1	0
	NZ.6 Brighton	0.96571	0.80942	1	1	0
	NZ.9 Kaikoura	0.98925	0.96864	1	1	1	0
Chatham Is	Chatham Is	0.99111	0.97208	1	1	1	1	0
New Zealand sub-Antarctic	Antipodes Is	0.98006	0.91163	1	1	1	1	1	0
	Campbell Is	0.96264	0.88145	0.96562	0.96562	0.97156	0.9916	0.99138	*0.00	0
	Auckland Is	0.97254	0.87511	1	1	1	1	1	*0.00	*-0.08	0
Macquarie Is	Macquarie Is	0.95952	0.92993	0.94924	0.94924	0.95461	0.97632	0.96758	0.96443	0.95652	0.95123	0
Falkland Is	Falkland Is_Cape Pembroke	0.90889	0.8809	0.88037	0.87421	0.89128	0.93296	0.90897	0.90708	0.90123	0.87457	0.84601	0
	Falkland Is_Sea Lion Island	0.98695	0.95376	1	1	1	1	1	1	0.98744	1	0.8921	0.85372	0
Chile	Ch.1 Cocholgue	0.97734	0.96188	0.97537	0.97537	0.97684	0.98655	0.98095	0.98102	0.97496	0.97257	0.95459	0.887	0.97293	0
	Ch.4 Cruise site 7	0.98614	0.96133	0.99313	0.99313	0.99396	0.9972	0.99573	0.99546	0.98614	0.99341	0.4661	0.86566	0.98432	0.97456	0
	Ch.6 Cruise site 2	0.81253	0.74783	0.73895	0.73694	0.76383	0.87511	0.82791	0.80187	0.79368	0.73994	0.35756	0.68803	0.4851	0.82988	0.30969	0
	Ch.8 Punta Arenas	0.79772	0.74925	0.7193	0.70716	0.74667	0.84243	0.77725	0.79064	0.78365	0.70821	0.66694	0.40652	0.62456	0.77221	0.65916	0.47281	0
South Georgia	South Georgia_Grytviken	0.96125	0.94041	0.95138	0.94874	0.95679	0.97509	0.96258	0.9654	0.95882	0.94874	0.9302	0.64835	0.94534	0.94047	0.95097	0.77674	0.51312	0
	South Georgia_Cobblers Cove	0.97717	0.96091	0.97561	0.9743	0.97817	0.98686	0.98142	0.98223	0.97615	0.9743	0.94536	0.25296	0.9712	0.95871	0.97189	0.79251	0.53631	0.82849	0
